# Supplementary material
Source: publisher figshare collection journal article supplement (https://acs.figshare.com/ndownloader/files/4129093)
Supplement: Supplementary file 1 [file 4129093]

## Supporting Information

Protein purity has been assayed by SDS-PAGE. An amount of 5  $\mu$ g of soluble hTau40 protein, purchased from Sigma (product code: T0-576) obtained from the same stock used for the SAXS experiment and subjected to the same thermal treatment, was resolved on 12% SDS-PAGE. MW: SeeBlue® Plus2 Pre-Stained Standard, Invitrogen (Cat.n. LC5925) (figure S1). As shown in fig S1, protein purity is > 90 % at 20 °C and the molecular mass is consistent with about 46 kD, which is the expected value for the tau isoform with 441 residues. At higher temperatures (40°C and 60 °C) tau protein does not exhibit significant modifications, pointing out that the thermal treatment does not induce protein aggregation.

This information is available free of charge via the Internet at <http://pubs.acs.org/>

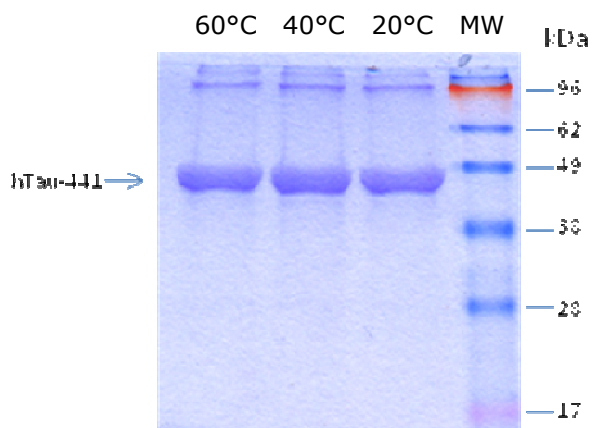

Fig S1. (color on line) SDS-PAGE analysis of hTau40 protein before and after thermal treatment.
